# Supplementary material
Source: publisher figshare collection journal article supplement (https://frontiersin.figshare.com/ndownloader/files/28875321)
Supplement: Supplementary file [file 28875321]

## Supplementary Figures

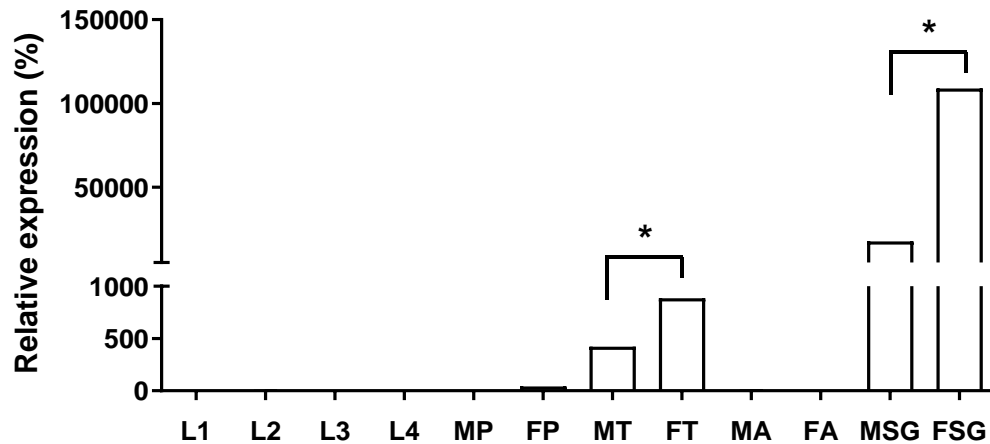

**Supplementary Figure 1.** AeMOPE-1 gene expression profile in different stages and tissues of *Ae. aegypti*. Gene expression was determined in larval stages L1 to L4 (L1-L4), male pupae (MP), female pupae (FP), male thorax (MT), female thorax (FT), male abdomen (MA), female abdomen (FA), male salivary gland (MSG) and female salivary gland (FSG) by RT-qPCR. Values are expressed as the mean  $\pm$  SEM of  $2^{-\Delta\Delta C_t}$  (n = 3). \* $P \leq 0.05$  versus larval stage L1 - One-way ANOVA.

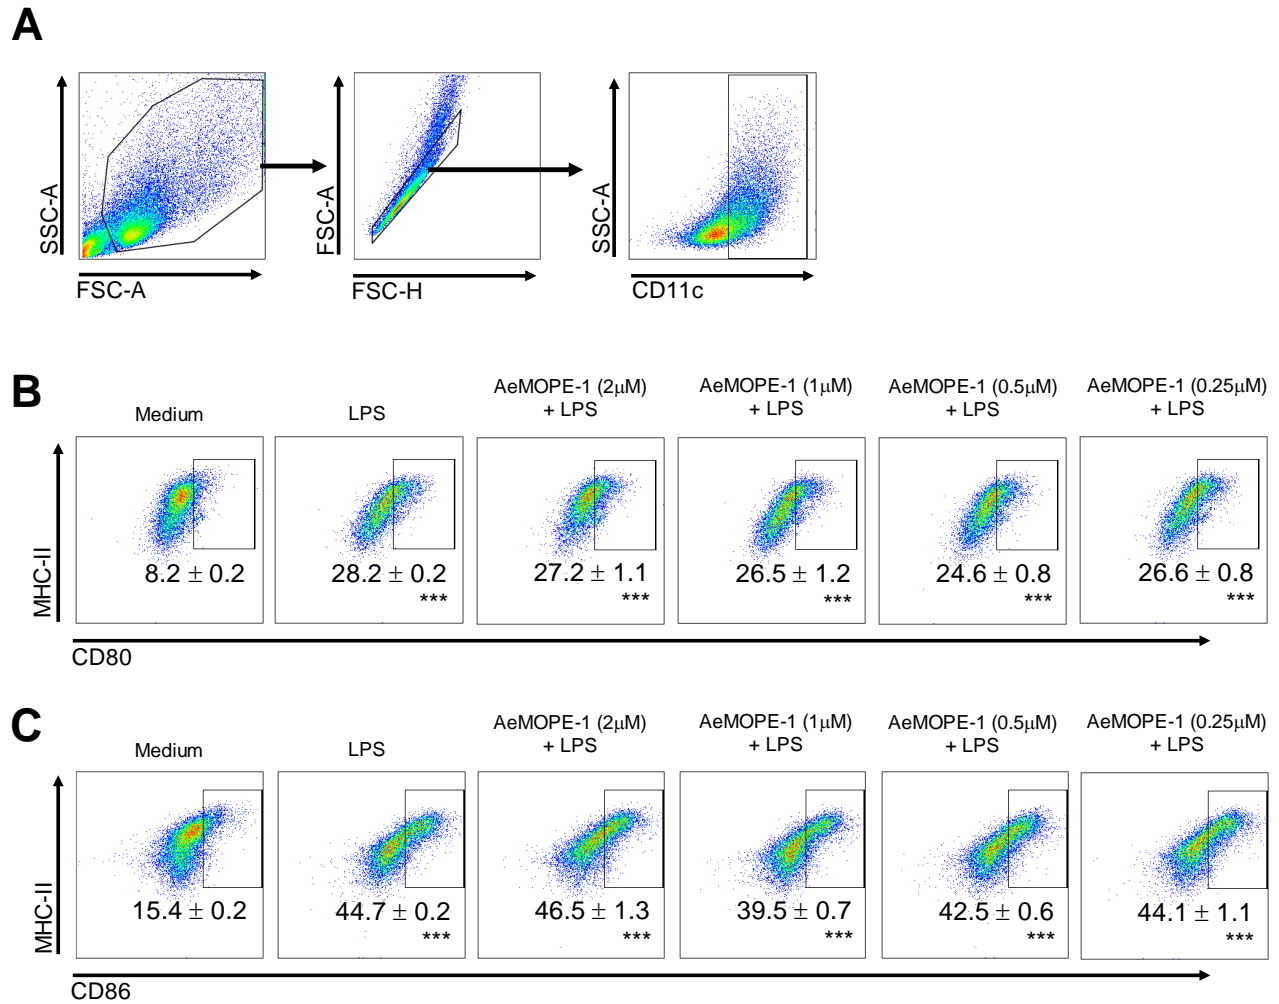

**Supplementary Figure 2.** Syn-AeMOPE-1 does not affect murine dendritic cell maturation. Bone marrow-derived dendritic cells were pre-incubated overnight with synthetic AeMOPE-1 (0.25 - 2 μM), stimulated with LPS (100 ng/mL) for 24 hours and the percentage of MHC class II<sup>+</sup> CD80<sup>+</sup> or MHC class II<sup>+</sup> CD86<sup>+</sup> cells were evaluated by flow cytometry. (A) Gating strategy. (B) CD80 expression in MHC class II<sup>+</sup> cells. (C) CD86 expression in MHC class II<sup>+</sup> cells. Results are expressed as the mean ± SEM from one representative experiment of four independent experiments assayed in quadruplicate. \*\*\**P* ≤ 0.001 versus unstimulated/untreated cells (Medium) – One-way ANOVA.

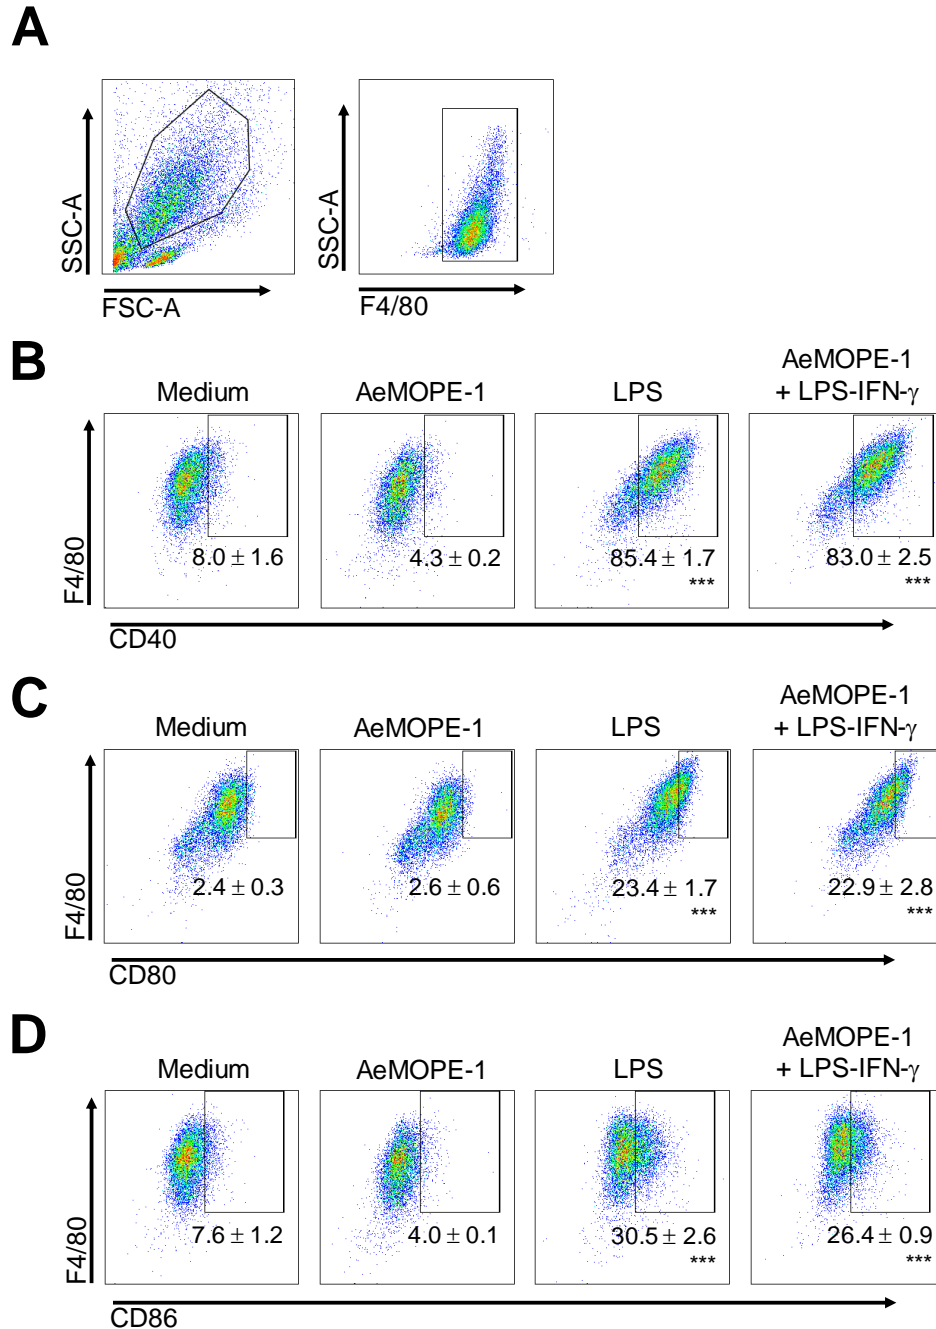

**Supplementary Figure 3.** Synthetic AeMOPE-1 does not affect the expression of accessory/costimulatory molecules by macrophages. Thioglycolate-elicited peritoneal macrophages were pre-incubated overnight with synthetic AeMOPE-1 (2  $\mu$ M), LPS+IFN- $\gamma$  (10 ng/mL of each) for 24 hours and the percentage of F4/80<sup>+</sup> CD40<sup>+</sup>, F4/80<sup>+</sup> CD80<sup>+</sup> and F4/80<sup>+</sup> CD86<sup>+</sup> cells were evaluated by flow cytometry. (A) Gating strategy. (B) CD80 expression in MHC class II<sup>+</sup> cells. (C) CD86 expression in MHC class II<sup>+</sup> cells. Results are expressed as the mean  $\pm$  SEM from one representative experiment of four independent experiments assayed in duplicate. \*\*\* $P \leq 0.001$  versus respective control group (Medium or AeMOPE-1) – One-way ANOVA.
